# Supplementary material for: Na+ diffusion kinetics in nanoporous metal-hexacyanoferrates
Source: Royal Society of Chemistry journal article supplement (doi:10.1039/c5dt03276h), 2015-09-18
Supplement: c5dt03276h1.pdf [file c5dt03276h1.pdf]

Supporting information

Na<sup>+</sup> diffusion kinetics in nanoporous metal-hexacyanoferrates

by

Takachi Masamitsu<sup>1</sup>, Yuya Fukuzumi<sup>1</sup>, and Yutaka Moritomo\*<sup>1,2,3</sup>

<sup>1</sup>Graduate School of Pure & Applied Science, University of Tsukuba

<sup>2</sup>Faculty of Pure & Applied Science, University of Tsukuba

<sup>3</sup>Center for Integrated Research in Fundamental Science and Engineering (CiRfSE),  
University of Tsukuba

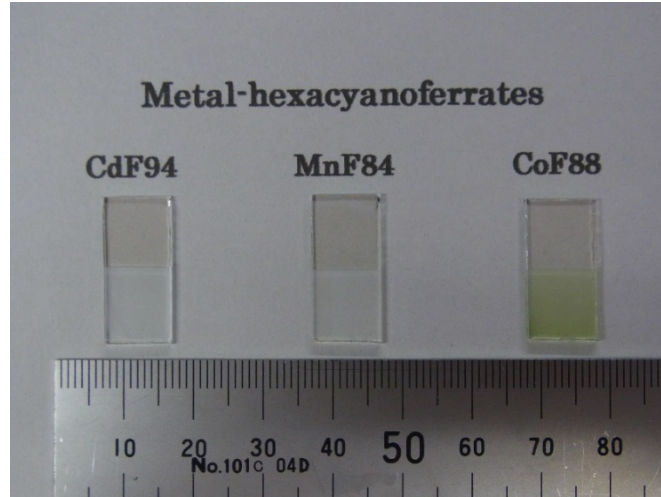

Fig. S1: Pictures of CoF88, MnF84, and CdF94 films on ITO transparent electrodes.

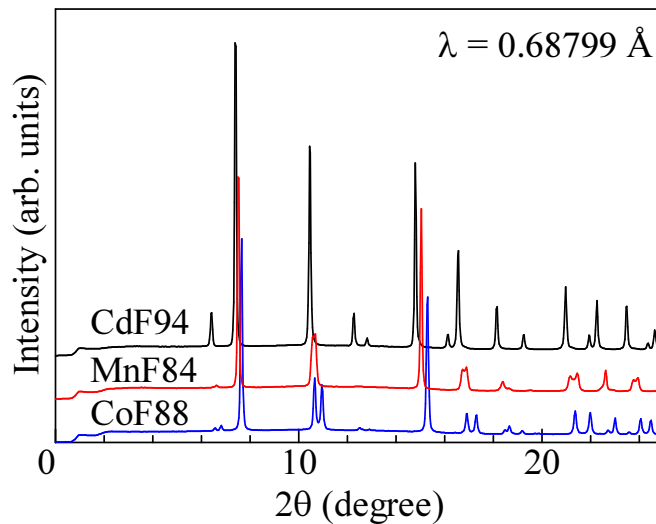

Fig. S2: X-ray powder diffraction patterns of as-grown CoF88, MnF84, and CdF94 films. The films were carefully removed from the ITO glass substrate with a microspatula, and then fine powders were used to fill  $300\mu\text{m}\phi$  glass capillaries. X-ray wavelength was  $0.68799 \text{ \AA}$ . Experiments were performed at BL8B of Photon Factory. In MnF84 and CoF88, all the reflections can be indexed in the hexagonal ( $R\bar{3}m$ ;  $Z=12$ ) setting. In CdF94, all the reflections can be indexed in the face-centered cubic ( $Fm\bar{3}m$ ;  $Z=4$ ) setting. The lattice constants were determined by Rietveld analysis:  $a_{\text{H}}/\sqrt{2}=10.515(1) \text{ \AA}$  and  $c_{\text{H}}/\sqrt{3}=10.085(1) \text{ \AA}$  for CoF88 ( $x=1.52$ ),  $a_{\text{H}}/\sqrt{2}=10.603(1) \text{ \AA}$  and  $c_{\text{H}}/\sqrt{3}=10.429(2) \text{ \AA}$  for MnF84 ( $x=1.36$ ), and  $a=10.7068(9) \text{ \AA}$  for CdF94 ( $x=1.76$ ).

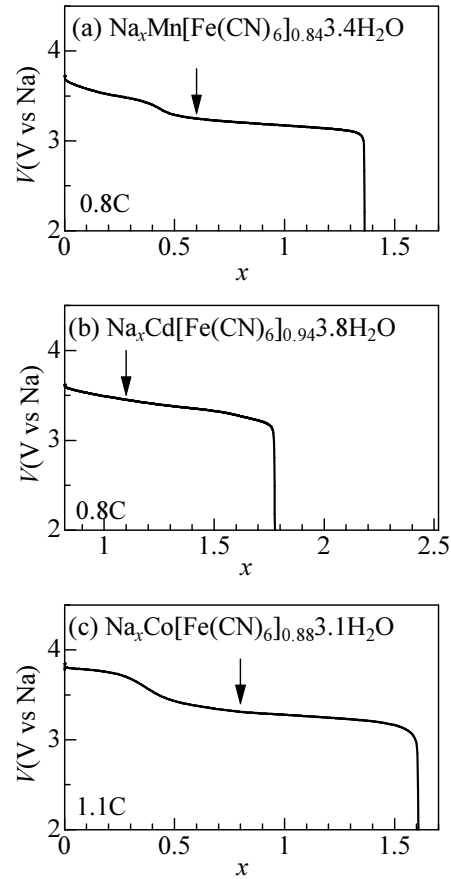

Fig. S3: Discharge curves of (a) MnF84, (b) CdF94, and (c) CoF88 films in propylene carbonate (PC) containing 1M NaClO<sub>4</sub> against Na metal. The redox reactions are as follows: (a)  $1.36\text{Na}^+ + \text{Mn}^{\text{II}}_{0.52}\text{Mn}^{\text{II}}_{0.48}[\text{Fe}^{\text{III}}(\text{CN})_6]_{0.84} \rightarrow \text{Na}^+ + \text{Na}_{0.36}\text{Mn}^{\text{II}}[\text{Fe}^{\text{III}}(\text{CN})_6]_{0.84} \rightarrow \text{Na}_{1.36}\text{Mn}^{\text{II}}[\text{Fe}^{\text{II}}(\text{CN})_6]_{0.84}$ , (b)  $0.94\text{Na}^+ + \text{Na}_{0.82}\text{Cd}^{\text{II}}[\text{Fe}^{\text{III}}(\text{CN})_6]_{0.94} \rightarrow \text{Na}_{1.76}\text{Cd}^{\text{II}}[\text{Fe}^{\text{II}}(\text{CN})_6]_{0.94}$ , (c)  $1.52\text{Na}^+ + \text{Co}^{\text{III}}[\text{Fe}^{\text{III}}(\text{CN})_6]_{0.52}[\text{Fe}^{\text{III}}(\text{CN})_6]_{0.48} \rightarrow \text{Na}^+ + \text{Na}_{0.52}\text{Co}^{\text{III}}[\text{Fe}^{\text{II}}(\text{CN})_6]_{0.88} \rightarrow \text{Na}_{1.52}\text{Co}^{\text{II}}[\text{Fe}^{\text{II}}(\text{CN})_6]_{0.88}$ . Arrows indicated the position where electrochemical impedance spectra were measured.

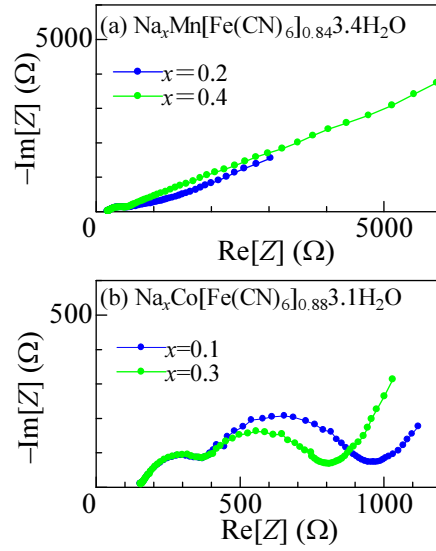

Fig. S4: Electrochemical impedance spectra (EIS) of (a) MnF84 and (b) CdF94 films in propylene carbonate (PC) containing 1M NaClO<sub>4</sub> against Na metal.

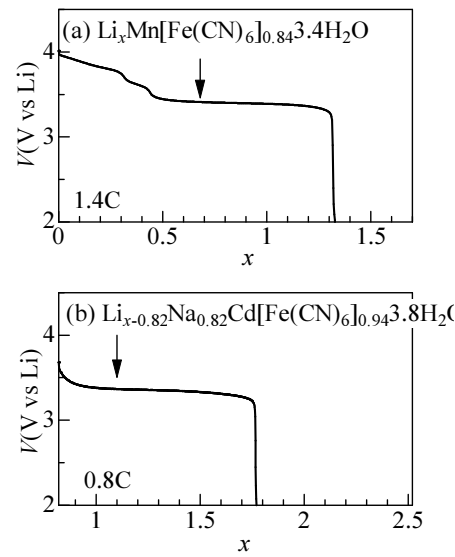

Fig. S5: Discharge curves of (a) MnF84 and (b) CdF94 films in ethylene carbonate (EC) / diethyl carbonate (DEC) containing 1M LiClO<sub>4</sub> against Na metal. The redox reactions are as follows: (a)  $1.36\text{Li}^+ + \text{Mn}^{\text{II}}_{0.52}\text{Mn}^{\text{II}}_{0.48}[\text{Fe}^{\text{III}}(\text{CN})_6]_{0.84} \rightarrow \text{Li}^+ + \text{Li}_{0.36}\text{Mn}^{\text{II}}[\text{Fe}^{\text{III}}(\text{CN})_6]_{0.84} \rightarrow \text{Li}_{1.36}\text{Mn}^{\text{II}}[\text{Fe}^{\text{II}}(\text{CN})_6]_{0.84}$ , (b)  $0.94\text{Li}^+ + \text{Na}_{0.82}\text{Cd}^{\text{II}}[\text{Fe}^{\text{III}}(\text{CN})_6]_{0.94} \rightarrow \text{Li}_{0.94}\text{Na}_{0.82}\text{Cd}^{\text{II}}[\text{Fe}^{\text{II}}(\text{CN})_6]_{0.94}$ . Arrows indicated the position where electrochemical impedance spectra were measured.

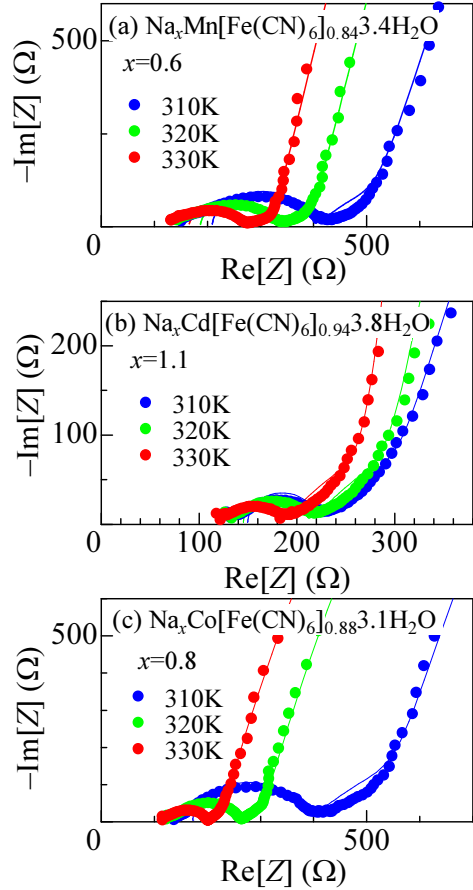

Fig. S6: Temperature dependence of the EIS curves of (a) MnF84, (b) CdF94 and (c) CoF88 films in PC containing 1M NaClO<sub>4</sub> against Na metal. Solid curves are results of the least-squares fittings with the Randles equivalent circuit model.

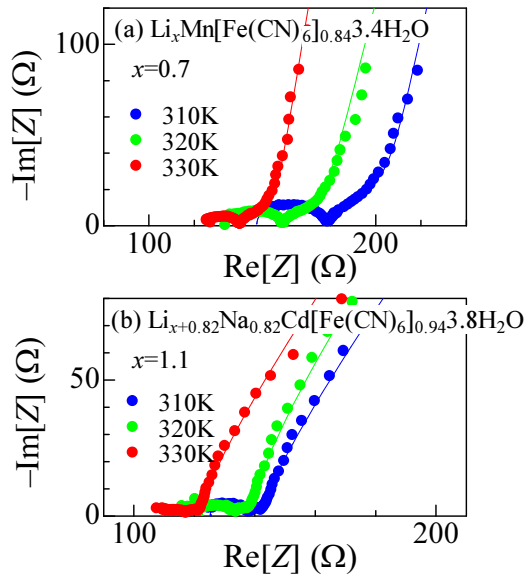

Fig. S7 Temperature dependence of the EIS curves of (a) MnF84 and (b) CdF94 films in ethylene carbonate (EC) / diethyl carbonate (DEC) containing 1M LiClO<sub>4</sub> against Li metal. Solid curves are results of the least-squares fittings with the Randles equivalent circuit model.

| film  | $x$ | $f_c$ (s <sup>-1</sup> ) | $D$ (cm <sup>2</sup> /s) | $E_a$ (eV) |
|-------|-----|--------------------------|--------------------------|------------|
| MnF84 | 0.6 | 0.10                     | $2.3 \times 10^{-10}$    | 0.22       |
| CdF94 | 1.1 | 0.19                     | $7.7 \times 10^{-10}$    | 0.12       |
| CoF88 | 0.8 | 0.05                     | $0.5 \times 10^{-10}$    | 0.86       |

Table. S1 Critical frequency ( $f_c$ ) at 305 K, Na<sup>+</sup> diffusion constant ( $D$ ) at 305 K, and activation energy ( $E_a$ ) of  $D$  of MnF84, CdF94, and CoF88. Note that  $D$  was determined by the least-squares fitting of the EISs, not from  $f_c$ .  $x$  is the Na concentration.

| film  | $x$ | $f_c$ (s <sup>-1</sup> ) | $D$ (cm <sup>2</sup> /s) | $E_a$ (eV) |
|-------|-----|--------------------------|--------------------------|------------|
| MnF84 | 0.7 | 0.19                     | $4.6 \times 10^{-10}$    | 0.48       |
| CdF94 | 1.1 | 1.16                     | $3.5 \times 10^{-9}$     | 0.25       |

Table. S2 Critical frequency ( $f_c$ ) at 305 K, Li<sup>+</sup> diffusion constant ( $D$ ) at 305 K, and activation energy ( $E_a$ ) of  $D$  of MnF84 and CdF94. Note that  $D$  was determined by the least-squares fitting of the EISs, not from  $f_c$ .  $x$  is the Li concentration.
